# Supplementary material for: Cost-effectiveness of internet-based vestibular rehabilitation with and without physiotherapy support for adults aged 50 and older with a chronic vestibular syndrome in general practice
Source: HighWire-hosted journal article supplement (doi:10.1136/bmjopen-2019-035583), 2020-10-01
Supplement: bmjopen-2019-035583supp007_data_supplement.pdf [file bmjopen-2019-035583supp007_data_supplement.pdf]

**Supplementary Figure 6. SA3 – societal perspective. Cost-effectiveness acceptability curve for clinically relevant response (improvement of  $\geq 3$  points on Vertigo Symptom Scale - Short Form) comparing stand-alone vestibular rehabilitation with usual care.**

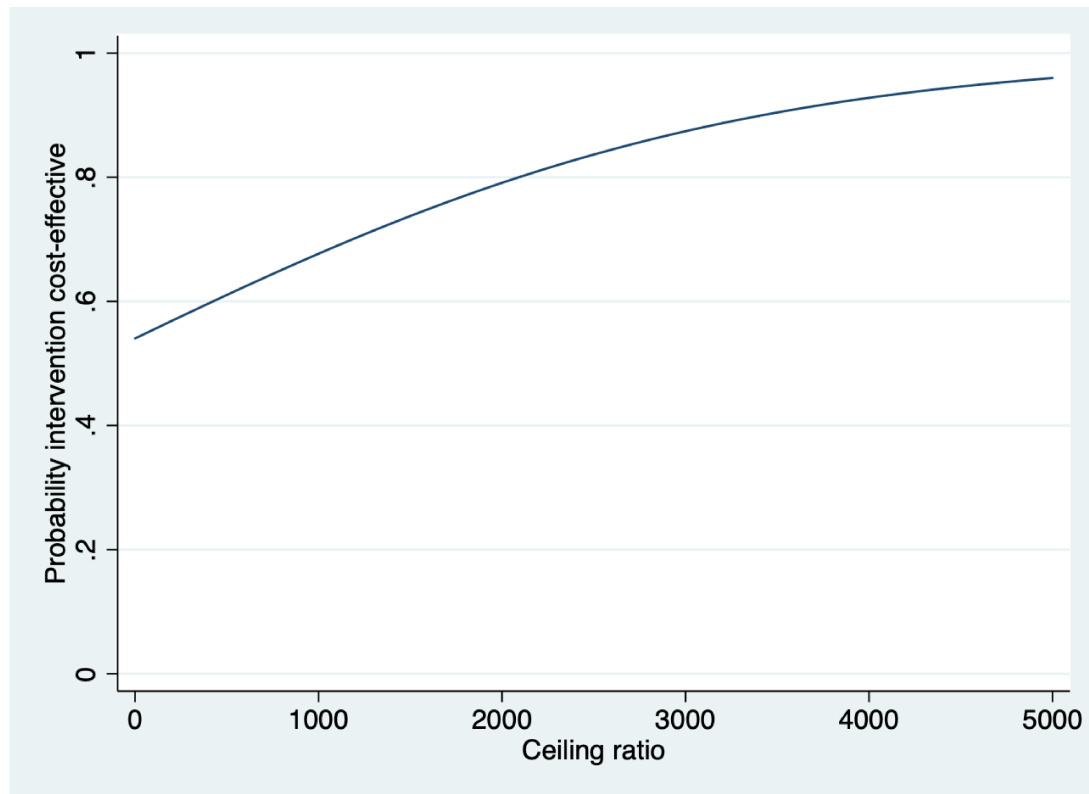

SA3 = sensitivity analysis with secondary care and medication costs excluded
